# Supplementary material for: Comparative Assessment of Intrinsic Disorder Predictions with a Focus on Protein and Nucleic Acid-Binding Proteins
Source: PubMed Central journal article supplement (PMC7762010; doi:10.3390/biom10121636), 2020-12-04
Supplement: biomolecules-10-01636-s001.pdf [file biomolecules-10-01636-s001.pdf]

# Supplement for “Comparative assessment of intrinsic disorder predictions with a focus on protein and nucleic acid-binding proteins”

Akila Katuwawala<sup>1</sup> and Lukasz Kurgan<sup>1\*</sup>

<sup>1</sup>Department of Computer Science, Virginia Commonwealth University, Richmond, Virginia, USA

\*corresponding author: lkurgan@vcu.edu

## Supplementary Tables

**Supplementary Table S1.** Predictive performance on the disorder-content equalized subset of the benchmark dataset, the disordered nucleic-acids binding proteins, and the disordered protein-binding proteins. We quantify statistical significance of differences in AUC between the best predictor (identified in bold font) and each the other nine predictors on a given dataset. We bootstrap 50% of the proteins 100 times. For normal measurements (tested with the Anderson-Darling test at 0.05 significance) we use paired t-test; otherwise we use the Wilcoxon rank sum test; = and + mean that the differences are not significant ( $p$ -value > 0.01) and significant ( $p$ -value  $\leq$  0.01), respectively.

| Dataset                                                              | Predictor              | AUC          | Precision | Sensitivity | MCC   |
|----------------------------------------------------------------------|------------------------|--------------|-----------|-------------|-------|
| Disorder-content equalized benchmark dataset                         | <b>ESpritz-DisProt</b> | <b>0.859</b> | 0.751     | 0.537       | 0.545 |
|                                                                      | SPOT-Disorder          | 0.819+       | 0.599     | 0.751       | 0.478 |
|                                                                      | ESpritz-Xray           | 0.816+       | 0.634     | 0.626       | 0.475 |
|                                                                      | IUPred-long            | 0.809+       | 0.669     | 0.695       | 0.472 |
|                                                                      | VSL2B                  | 0.808+       | 0.671     | 0.848       | 0.410 |
|                                                                      | IUPred-short           | 0.801+       | 0.645     | 0.606       | 0.448 |
|                                                                      | ESpritz-NMR            | 0.774+       | 0.599     | 0.713       | 0.415 |
|                                                                      | disEMBL                | 0.746+       | 0.570     | 0.455       | 0.357 |
|                                                                      | DISOPRED3              | 0.743+       | 0.518     | 0.635       | 0.352 |
| Disorder-content equalized disordered protein-binding proteins       | <b>ESpritz-DisProt</b> | <b>0.860</b> | 0.816     | 0.552       | 0.555 |
|                                                                      | ESpritz-Xray           | 0.796+       | 0.684     | 0.648       | 0.436 |
|                                                                      | IUPred-long            | 0.787+       | 0.701     | 0.741       | 0.440 |
|                                                                      | VSL2B                  | 0.777+       | 0.710     | 0.875       | 0.361 |
|                                                                      | IUPred-short           | 0.771+       | 0.672     | 0.617       | 0.394 |
|                                                                      | ESpritz-NMR            | 0.745+       | 0.639     | 0.738       | 0.369 |
|                                                                      | SPOT-Disorder          | 0.734+       | 0.587     | 0.807       | 0.363 |
|                                                                      | disEMBL                | 0.703+       | 0.610     | 0.423       | 0.286 |
|                                                                      | DISOPRED3              | 0.65+        | 0.522     | 0.668       | 0.205 |
| Disorder-content equalized disordered nucleic acids-binding proteins | <b>SPOT-Disorder</b>   | <b>0.874</b> | 0.752     | 0.814       | 0.581 |
|                                                                      | ESpritz-DisProt        | 0.843=       | 0.687     | 0.446       | 0.466 |
|                                                                      | ESpritz-Xray           | 0.835=       | 0.583     | 0.692       | 0.536 |
|                                                                      | IUPred-long            | 0.804=       | 0.571     | 0.685       | 0.463 |
|                                                                      | IUPred-short           | 0.800=       | 0.575     | 0.580       | 0.437 |
|                                                                      | VSL2B                  | 0.796+       | 0.522     | 0.834       | 0.387 |
|                                                                      | DISOPRED3              | 0.789+       | 0.500     | 0.720       | 0.507 |
|                                                                      | ESpritz-NMR            | 0.757+       | 0.493     | 0.765       | 0.390 |
|                                                                      | disEMBL                | 0.755+       | 0.548     | 0.486       | 0.388 |
| GlobPlot                                                             | 0.556+                 | 0.298        | 0.407     | 0.061       |       |

## Supplementary Figures

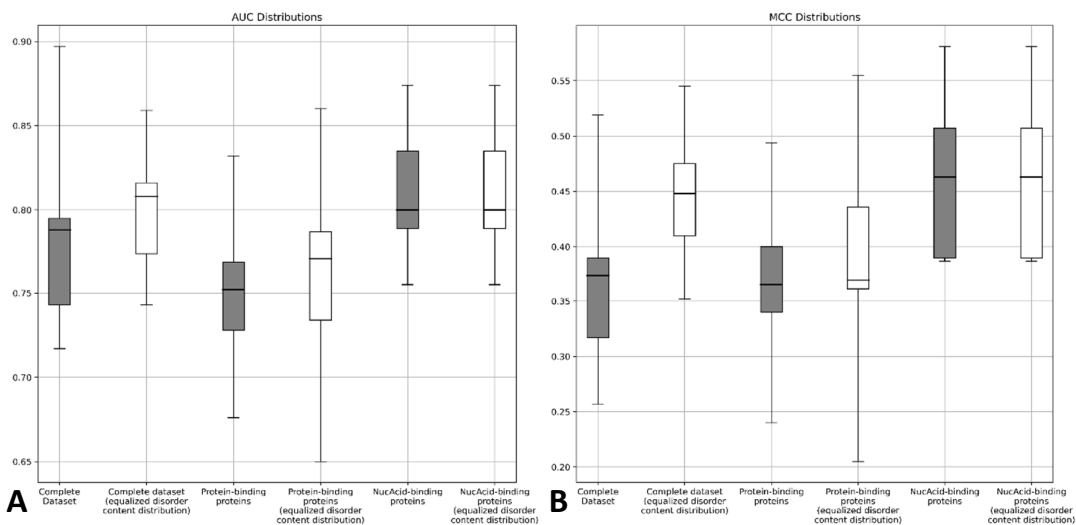

**Supplementary Figure S1.** Distribution of the AUCs (panel A) and MCCs (panel B) over nine disorder predictors. We exclude the poorly-performing GlobPlot from this analysis. The box plots show the lowest AUC (bottom error bar), first quartile (bottom of box), median (horizontal line inside box), third quartile (top of box) and highest AUC (top error bar). The grey plots are for the original datasets while the white plots are for the sampled/disorder content-equalized datasets that have similar distribution of the per-protein disorder content. The content distribution similarity was measured using Kolmogorov–Smirnov test at  $p$ -value of 0.001.
